# Supplementary material for: An F2 Barley Population as a Tool for Teaching Mendelian Genetics
Source: MDPI journal article supplement (doi:10.3390/plants10040694), 2021-04-03
Supplement: s1 [file s1]

Table S1. Opinion of students about genetics practices

|     | Have you understood the importance of using a cereal in Genetics practices? | Could this practice be carried out with some kind of horticultural? | Do you think that the use of an F2 population facilitates the understanding of the subject taught in theory? | Do you think that another type of population (F1 or test cross) would be just as suitable for carrying out the practices? | Do you consider that Bachelor's practices are designed to become familiar with techniques related to the subject taught? | Do Bachelor's practices facilitate the understanding and learning of the related subject? | Have you understood the concepts of Genetics better thanks to genetic practices? | Do you consider that the Genetics practices have been useful to pass the subject? |
|-----|-----------------------------------------------------------------------------|---------------------------------------------------------------------|--------------------------------------------------------------------------------------------------------------|---------------------------------------------------------------------------------------------------------------------------|--------------------------------------------------------------------------------------------------------------------------|-------------------------------------------------------------------------------------------|----------------------------------------------------------------------------------|-----------------------------------------------------------------------------------|
| NA  | 5.48                                                                        | 5.48                                                                | 0.00                                                                                                         | 12.33                                                                                                                     | 0.00                                                                                                                     | 1.37                                                                                      | 0.00                                                                             | 6.85                                                                              |
| LA  | 13.70                                                                       | 30.14                                                               | 2.74                                                                                                         | 32.88                                                                                                                     | 4.11                                                                                                                     | 4.11                                                                                      | 4.11                                                                             | 13.70                                                                             |
| MA  | 30.14                                                                       | 43.84                                                               | 6.85                                                                                                         | 27.40                                                                                                                     | 6.85                                                                                                                     | 15.07                                                                                     | 20.55                                                                            | 27.40                                                                             |
| MsA | 35.62                                                                       | 5.48                                                                | 45.21                                                                                                        | 17.81                                                                                                                     | 64.38                                                                                                                    | 52.05                                                                                     | 49.32                                                                            | 24.66                                                                             |
| CA  | 13.70                                                                       | 4.11                                                                | 43.84                                                                                                        | 4.11                                                                                                                      | 24.66                                                                                                                    | 27.40                                                                                     | 26.03                                                                            | 20.55                                                                             |
| N/A | 1.37                                                                        | 10.96                                                               | 1.37                                                                                                         | 5.48                                                                                                                      | 0.00                                                                                                                     | 0.00                                                                                      | 0.00                                                                             | 6.85                                                                              |

Data are given in percentage. Do not agree (NA), Little agree (LA), Moderately agree (MA), Mostly agree (MsA), Completely agree (CA), Not available (N/A).
