# Supplementary figures and images for: An F2 Barley Population as a Tool for Teaching Mendelian Genetics
Source: MDPI journal article supplement (doi:10.3390/plants10040694), 2021-04-03

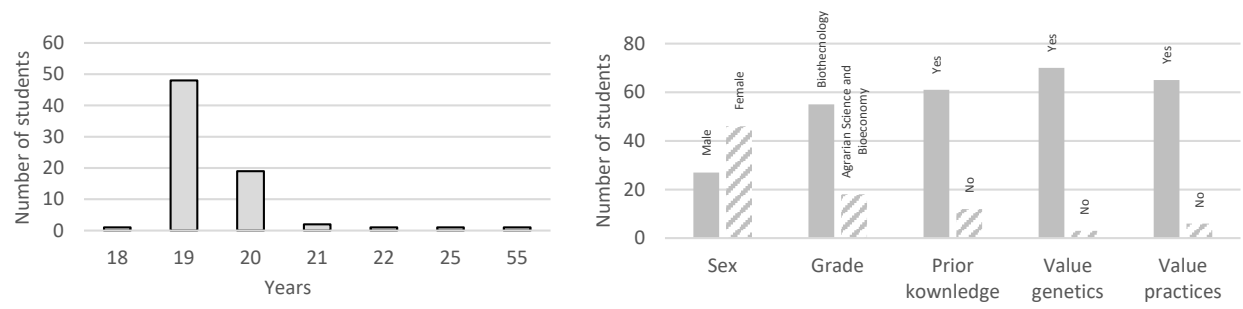

Figure S1. Students' profile. (a) Age range of students. (b) Personal and academic information.

Supplement: s1 [file s1]
